# Supplementary material for: Liver Transplantation for HCC in HIV-Infected Patients: Long-Term Single-Center Experience
Source: MDPI journal article supplement (doi:10.3390/cancers13184727), 2021-09-21
Supplement: s1 [file s1]

| Table S3. Variables enter in Cox regression for Overall survival pos LT |       |    |                |
|-------------------------------------------------------------------------|-------|----|----------------|
|                                                                         | Score | gl | <i>p</i> value |
| Waiting list time days                                                  | 0.894 | 1  | 0.344          |
| MELD                                                                    | 1.295 | 1  | 0.255          |
| HIV status                                                              | 0.912 | 1  | 0.340          |
| HCV                                                                     | 5.289 | 1  | 0.021          |
| HBV                                                                     | 2.866 | 1  | 0.090          |
| Type of LT                                                              | 0.540 | 1  | 0.462          |
| Donor age                                                               | 0.654 | 1  | 0.419          |
| Total ischemia time                                                     | 1.997 | 1  | 0.158          |
| RE-oltx                                                                 | 1.087 | 1  | 0.297          |
| mTOR drugs                                                              | .     | 0  | .              |
| SEx                                                                     | 3.420 | 1  | 0.064          |
| Age of recipient                                                        | 0.380 | 1  | 0.538          |

| Table S4. Variables enter in Logistic regression for HCC recurrence post LT |                               |        |    |                |
|-----------------------------------------------------------------------------|-------------------------------|--------|----|----------------|
|                                                                             |                               | score  | gl | <i>p</i> value |
| Variables                                                                   | HIV status                    | 0.101  | 1  | 0.751          |
|                                                                             | HCC grading (G3-G4)           | 11.146 | 1  | 0.001          |
|                                                                             | Age recipient                 | 0.148  | 1  | 0.700          |
|                                                                             | HCV                           | 0.160  | 1  | 0.689          |
|                                                                             | HBV                           | 1.083  | 1  | 0.298          |
|                                                                             | AFP                           | 0.055  | 1  | 0.815          |
|                                                                             | HCC Number                    | 17.460 | 1  | 0.000          |
|                                                                             | HCC Diameter (largest nodule) | 15.248 | 1  | 0.000          |
|                                                                             | San Francisco criteria        | 16.726 | 1  | 0.000          |
|                                                                             | Microvascular invasion        | 25.399 | 1  | 0.000          |
