# Supplementary material for: Liver Transplantation for HCC in HIV-Infected Patients: Long-Term Single-Center Experience
Source: MDPI journal article supplement (doi:10.3390/cancers13184727), 2021-09-21
Supplement: s1 [file s1]

**Table S1.** Study population after propensity score matching (PSM).

| POPULATION STUDY = 61  |                        |                         |         |                             |        |                |
|------------------------|------------------------|-------------------------|---------|-----------------------------|--------|----------------|
| Variable               |                        | HIV group <i>n</i> = 32 |         | Control Group <i>n</i> = 29 |        | <i>p</i> Value |
|                        |                        | number                  | %       | number                      | %      |                |
| SEX                    | M                      | 29                      | 90.6    | 24                          | 82.8   | ns             |
|                        | F                      | 3                       | 9.4     | 5                           | 17.2   |                |
| AGE                    | mean & sd              | 50.3                    | ± 5.676 | 53.3                        | ± 9.4  | ns             |
| CHILD                  | A /B                   |                         |         |                             |        | ns             |
|                        | C                      | 14                      |         | 11                          |        |                |
| MELD at LT             | mean & sd              | 17.6                    | ± 9.6   | 15.2                        | ± 5.9  | ns             |
| BMI                    | mean & sd              | 23.9                    | ± 3.7   | 26.3                        | ± 3.07 | ns             |
| TYPE OF LT             | Isolate                | 31                      | 96.9    | 29                          | 100    | ns             |
|                        | Com-bined Kidney-Liver | 1                       | 3.1     | 0                           |        |                |
|                        | HCV                    | 22                      | 68.7    | 22                          | 75.9   |                |
| ETIOLOGY               | HBV                    | 10                      | 31.3    | 7                           | 24.1   | ns             |
|                        | Alcohol                | 0                       |         | 0                           |        | ns             |
|                        | Biliary                | 0                       |         | 0                           |        | ns             |
|                        | Metabolic              | 0                       |         | 0                           |        | ns             |
|                        | Other                  | 0                       |         | 0                           |        | ns             |
| WAITING LIST TIME days | mean & sd              | 234                     | ± 150   | 158.6                       | ±112   | ns             |
| RE-OLT                 | YES                    | 2                       | 6.2     | 3                           | 10.3   | ns             |

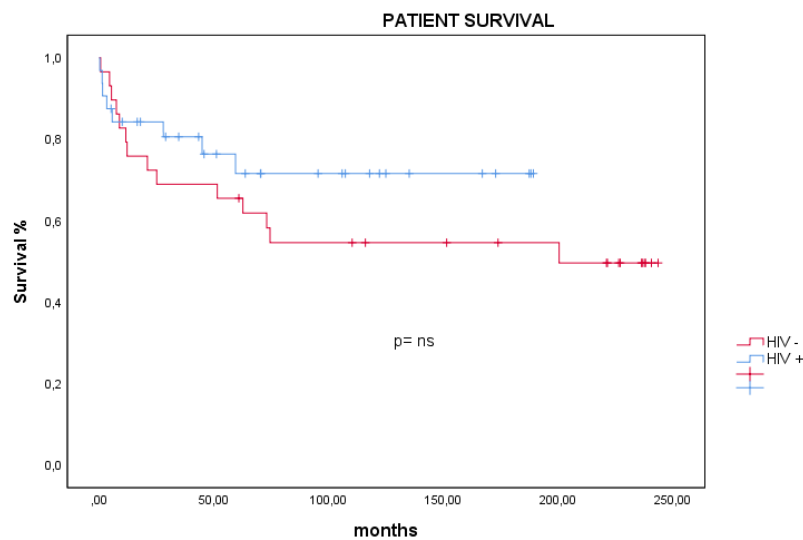

**Figure S1.** Overall survival in HIV+ and HIV – group.

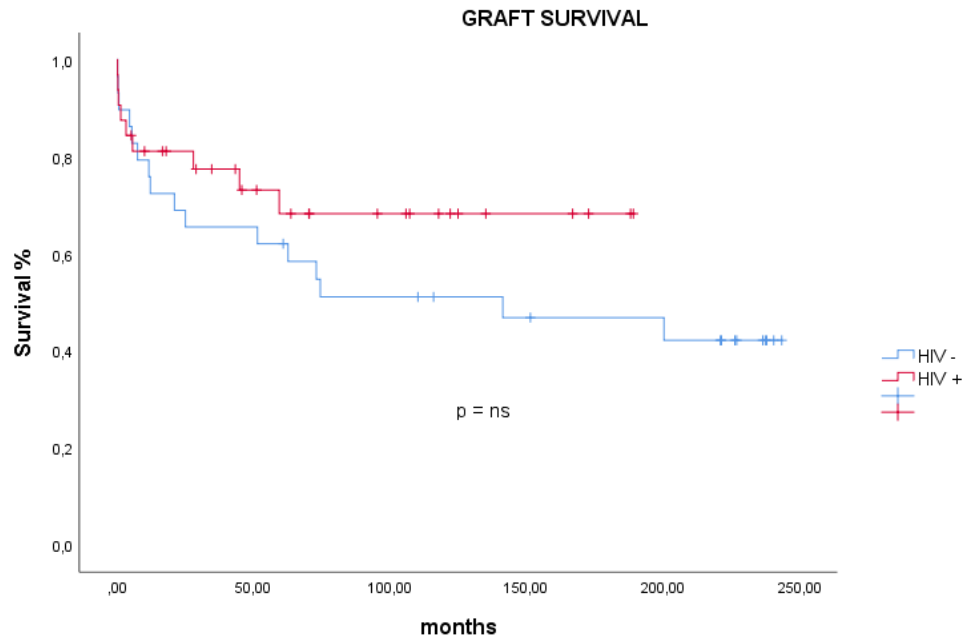

**Figure S2.** Graft survival in HIV + and HIV – group.

**Table S2.** Univariate e multivariate analysis of factor impacting the patient survival post-LT in the population

| Variable               | Scote | gl | <i>p</i> value |
|------------------------|-------|----|----------------|
| HIV +                  | 2.261 | 1  | 0.133          |
| AGE OF RECIPIENTS      | 0.547 | 1  | 0.460          |
| SEX                    | 0.894 | 1  | 0.344          |
| HCV                    | 2.773 | 1  | 0.096          |
| HBV                    | 3.322 | 1  | 0.068          |
| WAITING LIST TIME days | 0.184 | 1  | 0.668          |
| MELD                   | 4.579 | 1  | 0.032          |
| TOTAL ISCHEMIA TIME    | 0.133 | 1  | 0.715          |
| DONOR AGE              | 1.318 | 1  | 0.251          |
| RE-oltx                | 0.558 | 1  | 0.455          |

| Cox regression analysis |        |       |       |    |                |       |                 |       |
|-------------------------|--------|-------|-------|----|----------------|-------|-----------------|-------|
| Variable                | B      | SE    | Wald  | gl | <i>p</i> value | HR    | 95.0% CI for HR |       |
| HIV +                   | -1.282 | 0.631 | 4.133 | 1  | 0.042          | 0.278 | Min             | max   |
| MELD                    | 0.091  | 0.035 | 6.672 | 1  | 0.010          | 1.096 | 1.022           | 1.174 |
